# Supplementary material
Source: Research Square preprint supplement (doi:10.21203/rs.3.rs-8927701/v1)
Supplement: Supplementary file 1 [file f785852a5630425ff391ce0c.docx]

Table S1: MIC distribution of cefiderocol, aztreonam/avibactam and cefepime/zidebactam against isolates non-susceptible to TMP-SMX, levofloxacin and/or Minocycline

| **Antimicrobial Agents** | **MIC (mg/L)**  **No. of isolates (cumulative % of inhibition)** | | | | | | | | | | | | | |
| --- | --- | --- | --- | --- | --- | --- | --- | --- | --- | --- | --- | --- | --- | --- |
| **≤0.12** | **0.25** | **0.5** | **1** | **2** | **4** | **8** | **16** | **32** | **64** | **128** | **>128** |
| **TMP-SMX non-susceptible isolates (n=18)** | | | | | | | | | | | | | |
| TMP-SMX |  |  |  |  |  | 10 [55.56] | 5 [83.33] | 1 [88.89] | 1 [94.44] | 1 [100] |  |  |
| Levofloxacin |  | 3 [16.67] | 6 [50] | 1 [55.56] | 4 [77.78] |  | 3 [94.44] | 1 [100] |  |  |  |  |
| Minocycline | 3 [16.67] | 2 [27.78] | 5 [55.56] | 3 [72.22] | 3 [88.89] | 1 [94.44] |  |  |  |  | 1 [100] |  |
| Cefiderocol | 13 [72.22] | 1 [77.78] | 2 [88.89] | 1 [94.44] |  |  |  | 1 [100] |  |  |  |  |
| Aztreonam/avibactam |  |  | 1 [5.56] | 1 [11.11] | 6 [44.44] | 8 [88.89] | 1 [94.44] |  |  |  | 1 [100] |  |
| Cefepime/zidebactam |  |  | 1 [5.56] | 1 [11.11] | 3 [27.78] | 3 [44.44] | 6 [77.78] | 1 [83.33] |  | 3 [100] |  |  |
| **Levofloxacin non-susceptible isolates (n=18)** | | | | | | | | | | | | | |
| Levofloxacin | 2 [11.11] |  | 6 [44.44] | 3 [61.11] | 3 [77.78] | 1 [83.33] | 1 [88.89] | 1 [94.44] | 1 [100] |  |  |  |
| TMP-SMX |  |  |  |  |  | 6 [33.33] | 9 [83.33] | 2 [94.44] |  |  | 1 [100] |  |
| Minocycline | 1 [5.56] | 1 [11.11] | 3 [27.78] | 4 [50] | 5 [77.78] | 2 [88.89] | 1 [94.44] |  |  |  |  | 1 [100] |
| Cefiderocol | 13 [72.22] | 2 [83.33] | 2 [94.44] |  | 1 [100] |  |  |  |  |  |  |  |
| Aztreonam/avibactam |  |  |  | 1 [5.56] | 6 [38.89] | 9 [88.89] | 2 [100] |  |  |  |  |  |
| Cefepime/zidebactam |  |  |  |  | 2 [11.11] | 1 [16.67] | 6 [50] | 6 [83.33] |  | 2 [94.44] | 1 [100] |  |
| **Minocycline non-susceptible isolates (n=17)** | | | | | | | | | | | | | |
| Minocycline | 3 [17.65] | 1 [23.53] | 3 [41.18] | 2 [52.94] | 3 [70.59] | 3 [88.24] | 1 [94.12] |  | 1 [100] |  |  |  |
| TMP-SMX |  | 2 [11.76] | 2 [23.53] | 3 [41.18] | 1 [47.06] | 1 [52.94] | 5 [82.35] | 2 [94.12] |  |  | 1 [100] |  |
| Levofloxacin |  |  |  |  | 11 [64.71] | 2 [76.47] | 1 [82.35] |  |  |  | 2 [94.12] | 1 [100] |
| Cefiderocol | 10 [58.82] | 3 [76.47] | 3 [94.12] |  |  |  |  | 1 [100] |  |  |  |  |
| Aztreonam/avibactam |  |  |  |  | 9 [52.94] | 6 [88.24] | 1 [94.12] |  |  |  | 1 [100] |  |
| Cefepime/zidebactam |  |  |  |  | 1 [5.88] | 5 [35.29] | 5 [64.71] | 3 [82.35] |  | 2 [94.12] | 1 [100] |  |
| **TMP-SMX and levofloxacin non-susceptible isolates (n=4)** | | | | | | | | | | | | | |
| TMP-SMX |  |  |  |  |  | 1 [25] | 1 [50] | 1 [75] | 1 [100] |  |  |  |
| Levofloxacin |  |  |  |  |  |  | 3 [75] | 1 [100] |  |  |  |  |
| Minocycline | 1 [25] |  | 1 [50] |  | 1 [75] | 1 [100] |  |  |  |  |  |  |
| Cefiderocol | 4 [100] |  |  |  |  |  |  |  |  |  |  |  |
| Aztreonam/avibactam |  |  |  | 1 [25] |  | 3 [100] |  |  |  |  |  |  |
| Cefepime/zidebactam |  |  |  |  | 1 [25] |  | 1 [50] | 1 [75] |  | 1 [100] |  |  |

Table S2: MICs of tested agents against *S. maltophilia* isolates (n=12) included in time-kill experiments

| **Isolate** | **MIC (mg/L)** | | | | | |
| --- | --- | --- | --- | --- | --- | --- |
| TMP-SMX | Levofloxacin | Minocycline | Cefiderocol | Aztreonam/avibactam | Cefepime/zidebactam |
| SM1 | 4 | 2 | 1 | 1 | 2 | 8 |
| SM2 | 0.5 | 4 | 1 | 2 | 4 | 64 |
| SM3 | 2 | 1 | 2 | 0.25 | 2 | 32 |
| SM4 | 1 | 2 | 4 | 0.12 | 2 | 8 |
| SM5 | 4 | 2 | 2 | 0.12 | 0.5 | 64 |
| SM6 | 0.5 | 2 | 2 | 1 | 2 | 64 |
| SM7 | 1 | 1 | 2 | 0.25 | 1 | 4 |
| SM8 | 2 | 4 | 4 | 0.5 | 2 | 16 |
| SM9 | 0.25 | 4 | 4 | 0.5 | 4 | 8 |
| SM10 | 0.5 | 0.5 | 1 | 0.12 | 1 | 32 |
| SM11 | 2 | 4 | 0.25 | 0.12 | 0.5 | 16 |
| SM12 | 1 | 8 | 4 | 0.12 | 8 | 32 |
